# Supplementary material
Source: publisher site journal article supplement (https://oneecosystem.pensoft.net/article/download/suppl/6814368/)
Supplement: Supplementary file 1

## Sheet: Tabelle1
ID	Court yard	Tree species	Height	Circumference in cm	DBH/DRC in cm	TAXA	ß_0	ß_1	spg	Biomass kg dry weight	biomass * 0.2	Carbon stock in kg	comment
1	1	Quercus robur L.	16.3	86	27.37	Fagaceae	-2.0705	2.441	0.59	406.78	325.43	162.71
2	1	Quercus robur L.	16.4	85	27.06	Fagaceae	-2.0705	2.441	0.59	395.33	316.27	158.13
3	1	Platanus acerifolia	14.9	97	30.88	Platanaceae	-2.2118	2.4133	0.46	430.86	344.68	172.34
4	1	Betula papyrifera	6.9	26	8.28	Betulaceae	-2.2271	2.4513	0.48	19.17	15.34	7.67
4b	1	Betula papyrifera	5.3	20	6.37	Betulaceae	-2.2271	2.4513	0.48	10.08	8.06	4.03
5	1	Betula pendula	5.1	17	5.41	Betulaceae	-1.8096	2.348	0.51	8.63	6.9	3.45
6	1	Salix viminalis	7.5	33, 19, 44, 20	19.59	Salicaceae	-2.4441	2.4561	0.36	129.32	103.46	51.73	multiple stems
7	1	Platanus acerifolia	14.9	71	22.6	Platanaceae	-2.2118	2.4133	0.46	202.91	162.33	81.16
8	1	Platanus acerifolia	16.9	127	40.43	Platanaceae	-2.2118	2.4133	0.46	825.59	660.47	330.24
9	1	Sorbus aucuparia	11.7	54	17.19	Rosaceae	-2.2118	2.4133	0.52	104.82	83.86	41.93
10	1	Betula pendula	13.8	55	17.51	Betulaceae	-1.8096	2.348	0.51	135.88	108.71	54.35
11	1	Betula pendula	6.9	28	8.91	Betulaceae	-1.8096	2.348	0.51	27.84	22.27	11.14
12	1	Betula pendula	14.6	77	24.51	Betulaceae	-1.8096	2.348	0.51	299.41	239.53	119.77
13	1	Picea abies	7.1	60	19.1	Pinaceae	-3.2007	2.5339	0.36	71.76	57.41	28.7
14	1	Prunus Avium L.	8	63	20.05	Rosaceae	-2.2118	2.4133	0.47	152.06	121.64	60.82
15	1	Betula pendula	3.2	17	5.41	Betulaceae	-1.8096	2.348	0.51	8.63	6.9	3.45
16	1	Salix viminalis	9.2	79.5	25.31	Salicaceae	-2.4441	2.4561	0.36	242.65	194.12	97.06
17	1	Prunus Avium L.	7.7	53.5	17.03	Rosaceae	-2.2118	2.4133	0.47	102.49	81.99	41
18	1	Prunus serrulata	6.6	23, 35, 35, 35, 35	23.45	Rosaceae	-2.2118	2.4133	0.47	221.9	177.52	88.76	multiple stems
19	2	Salix alba	15.2	84, 50, 41	33.74	Salicaceae	-2.6863	2.4561	0.36	386.11	308.88	154.44	multiple stems
20	2	Salix alba	21.4	106, 108	48.17	Salicaceae	-2.6863	2.4561	0.36	925.55	740.44	370.22	multiple stems
20b	2	Salix alba	21	120, 85	46.81	Salicaceae	-2.6863	2.4561	0.36	862.68	690.14	345.07	multiple stems
21	2	Salix alba	21.2	169, 155	72.99	Salicaceae	-2.6863	2.4561	0.36	2569.03	2055.23	1027.61	multiple stems
22	2	Platanus acerifolia	12.9	94	29.92	Platanaceae	-2.2118	2.4133	0.46	399.4	319.52	159.76
23	2	Platanus acerifolia	19.3	121	38.52	Platanaceae	-2.2118	2.4133	0.46	734.58	587.67	293.83
24	2	Platanus acerifolia	20.9	145	46.15	Platanaceae	-2.2118	2.4133	0.46	1136.8	909.44	454.72
25	2	Platanus acerifolia	20.9	131	41.7	Platanaceae	-2.2118	2.4133	0.46	889.75	711.8	355.9
26	2	Platanus acerifolia	19.2	137	43.61	Platanaceae	-2.2118	2.4133	0.46	991.3	793.04	396.52
27	2	Acer saccharinum	18.4	122	38.83	Aceraceae	-2.047	2.3852	0.44	797.23	637.78	318.89
28	2	Acer saccharinum	15.6	138	43.93	Aceraceae	-2.047	2.3852	0.44	1069.64	855.71	427.86
29	2	Picea pungens	6.2	34	10.82	Pinaceae	-3.2007	2.5339	0.36	17.02	13.61	6.81
30	2	Quercus rubra	12.9	95	30.24	Fagaceae	-2.0705	2.441	0.56	518.65	414.92	207.46
31	2	Fraxinus excelsior	8.6	47	14.96	Olwaceae	-2.0314	2.3524	0.51	76.16	60.93	30.46
32	2	Acer tartaricum	7.1	28, 34, 10, 27	16.75	Aceraceae	-2.047	2.3852	0.47	107.28	85.82	42.91	multiple stems
33	2	Acer tartaricum	8	49	15.6	Aceraceae	-2.047	2.3852	0.47	90.5	72.4	36.2
34	2	Acer tartaricum	6	23, 21, 23, 19, 13	14.34	Aceraceae	-2.047	2.3852	0.47	74.04	59.23	29.62	multiple stems
35	2	Chamaecyparis lawsoniana	10.4	56	17.83	Cupressaceae	-2.7765	2.4195	0.43	66.23	52.99	26.49
37	2	Betula pendula	14	67	21.33	Betulaceae	-1.8096	2.348	0.51	215.98	172.79	86.39
39	2	Acer campestre	7	14	4.46	Aceraceae	-1.8011	2.3852	0.47	5.83	4.66	2.33
40	2	Acer campestre	5.7	40	12.73	Aceraceae	-1.8011	2.3852	0.47	71.32	57.06	28.53
41	2	Prunus Avium L.	5.7	36	11.46	Rosaceae	-2.2118	2.4133	0.47	39.4	31.52	15.76
42	2	Prunus Avium L.	4.7	25	7.96	Rosaceae	-2.2118	2.4133	0.47	16.34	13.07	6.54
43	2	Prunus Avium L.	6.7	31	9.87	Rosaceae	-2.2118	2.4133	0.47	27.46	21.97	10.99
44	2	Betula pendula	15.5	100, 97	44.35	Betulaceae	-1.8096	2.348	0.51	1204.78	963.83	481.91	multiple stems
45	2	Betula pendula	8	33	10.5	Betulaceae	-1.8096	2.348	0.51	40.95	32.76	16.38
46	2	Betula pendula	13.4	69	21.96	Betulaceae	-1.8096	2.348	0.51	231.43	185.14	92.57
47	3	Betula pendula	14.3	72	22.92	Betulaceae	-1.8096	2.348	0.51	255.75	204.6	102.3
48	3	Thuja occidentalis	8.5	45	14.32	Cupressaceae	-1.9615	2.1063	0.31	38.3	30.64	15.32
49	3	Prunus Avuim	4.4	64	20.37	Rosaceae	-2.2118	2.4133	0.47	157.95	126.36	63.18
50	3	Prunus Avuim	4.9	40	12.73	Rosaceae	-2.2118	2.4133	0.47	50.81	40.64	20.32
52	3	Prunus Avuim	4.6	57	18.14	Rosaceae	-2.2118	2.4133	0.47	119.43	95.54	47.77
53	3	Prunus Avuim	4.7	58	18.46	Rosaceae	-2.2118	2.4133	0.47	124.55	99.64	49.82
54	3	Prunus Avuim	4.5	83	26.42	Rosaceae	-2.2118	2.4133	0.47	295.78	236.62	118.31
55	3	Prunus Avuim	4.6	64	20.37	Rosaceae	-2.2118	2.4133	0.47	157.95	126.36	63.18
57	3	Prunus Avuim	6.4	79	25.15	Rosaceae	-2.2118	2.4133	0.47	262.54	210.03	105.02
56	3	Prunus Avuim	5.3	54, 43	21.97	Rosaceae	-2.2118	2.4133	0.47	189.58	151.66	75.83	multiple stems
58	3	Prunus Avuim	5.4	75	23.87	Rosaceae	-2.2118	2.4133	0.47	231.6	185.28	92.64
59	3	Prunus Avuim	4.2	80	25.46	Rosaceae	-2.2118	2.4133	0.47	270.63	216.51	108.25
60	3	Prunus Avuim	5.6	52	16.55	Rosaceae	-2.2118	2.4133	0.47	95.69	76.56	38.28
61	3	Acer tataricum subsp. ginnala	6	26	8.28	Aceraceae	-2.047	2.3852	0.47	19.96	15.97	7.98	multiple stems > 6, dbh at 30cm
62	3	Acer tataricum subsp. ginnala	7.7	37	11.78	Aceraceae	-2.047	2.3852	0.47	46.31	37.05	18.52	multiple stems > 6, dbh at 30cm
63	3	Acer tataricum subsp. ginnala	5	16, 9, 13, 11, 21, 8	10.71	Aceraceae	-2.047	2.3852	0.47	36.92	29.53	14.77	multiple stems
64	3	Acer platanoides	9.4	95	30.24	Aceraceae	-1.8011	2.3852	0.47	561.38	449.1	224.55
65	3	Acer platanoides	13.8	113	35.97	Aceraceae	-1.8011	2.3852	0.47	849.17	679.33	339.67
66	3	Betula Pendula	14.4	74	23.55	Betulaceae	-1.8096	2.348	0.51	272.74	218.19	109.1
67	3	Betula Pendula	15.5	77	24.51	Betulaceae	-1.8096	2.348	0.51	299.41	239.53	119.77
68	3	Betula Pendula	13.7	83	26.42	Betulaceae	-1.8096	2.348	0.51	357.1	285.68	142.84
69	3	Betula Pendula	13.5	50	15.92	Betulaceae	-1.8096	2.348	0.51	108.64	86.91	43.45
70	3	Acer campestre	5.5	23	7.32	Aceraceae	-1.8011	2.3852	0.47	19.05	15.24	7.62
71	3	Acer campestre	5.5	25	7.96	Aceraceae	-1.8011	2.3852	0.47	23.25	18.6	9.3
73	3	Betula Pendula	16.8	75	23.87	Betulaceae	-1.8096	2.348	0.51	281.47	225.18	112.59
74	3	Betula Pendula	13.1	76	24.19	Betulaceae	-1.8096	2.348	0.51	290.36	232.29	116.15
75	3	Aesculus hippocastanum	5.8	30	9.55	Aceraceae	-2.047	2.3852	0.33	28.08	22.47	11.23
76	3	Acer platanoides	5.2	15	4.77	Aceraceae	-1.8011	2.3852	0.47	6.87	5.5	2.75
77	3	Aesculus hippocastanum	4.1	17	5.41	Aceraceae	-2.047	2.3852	0.33	7.25	5.8	2.9
78	3	Aesculus hippocastanum	3.5	14	4.46	Aceraceae	-2.047	2.3852	0.33	4.56	3.65	1.82
79	3	Acer platanoides	4.7	15	4.77	Aceraceae	-1.8011	2.3852	0.47	6.87	5.5	2.75
80	4	Betula pendula	10.9	73	23.24	Betulaceae	-1.8096	2.348	0.51	264.16	211.33	105.67
81	4	Pinus sylvestris	7.9	82	26.1	Pinaceae	-3.2007	2.5339	0.43	158.36	126.69	63.34	drc
82	4	Pinus sylvestris	7.6	75.5	24.03	Pinaceae	-3.2007	2.5339	0.43	128.46	102.77	51.38	drc
83	4	Prunus padus L.	8.3	58	18.46	Rosaceae	-2.2118	2.4133	0.47	124.55	99.64	49.82
85	4	Pinus sylvestris	8.5	63	20.05	Pinaceae	-3.2007	2.5339	0.43	81.2	64.96	32.48	drc
86	4	Robinia pseudoacacia	17.2	69.5, 88, 110	50	Fabaceae	-2.5095	2.6175	0.66	2276.13	1820.91	910.45	multiple stems
89	4	Pinus sylvestris	7.7	68.5	21.8	Pinaceae	-3.2007	2.5339	0.43	100.39	80.31	40.16	drc
90	4	Betula pendula	12	63	20.05	Betulaceae	-1.8096	2.348	0.51	186.92	149.53	74.77
91	4	Pinus sylvestris	9.8	78	24.83	Pinaceae	-3.2007	2.5339	0.43	139.51	111.61	55.8	drc
92	4	Pinus sylvestris	11.9	96	30.56	Pinaceae	-3.2007	2.5339	0.43	236.1	188.88	94.44	drc
93	4	Pinus sylvestris	4.5	53	16.87	Pinaceae	-3.2007	2.5339	0.43	52.4	41.92	20.96	drc
94	4	Acer platanoides	8.2	59	18.78	Aceraceae	-1.8011	2.3852	0.47	180.23	144.18	72.09
